# Supplementary material
Source: MDPI journal article supplement (https://www.mdpi.com/2227-9717/11/8/2466)
Supplement: s1 [file s1]

## Supplementary material

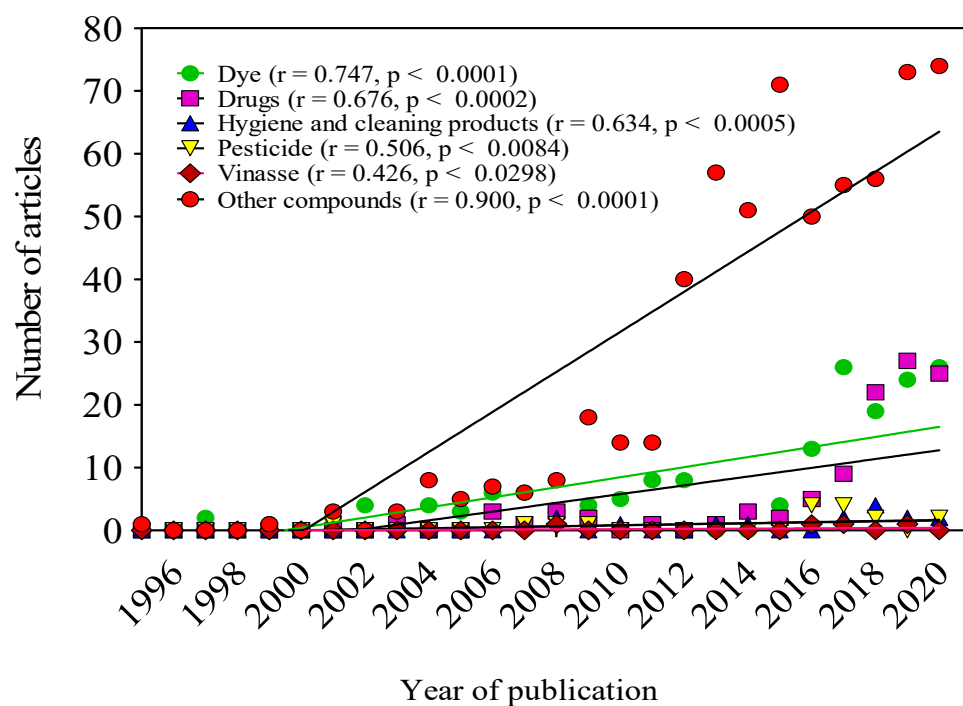

**Figure S1.** Time trend for the number of articles published between 1995 and 2020 in the Web of Science database, considering compounds degraded by Fenton.

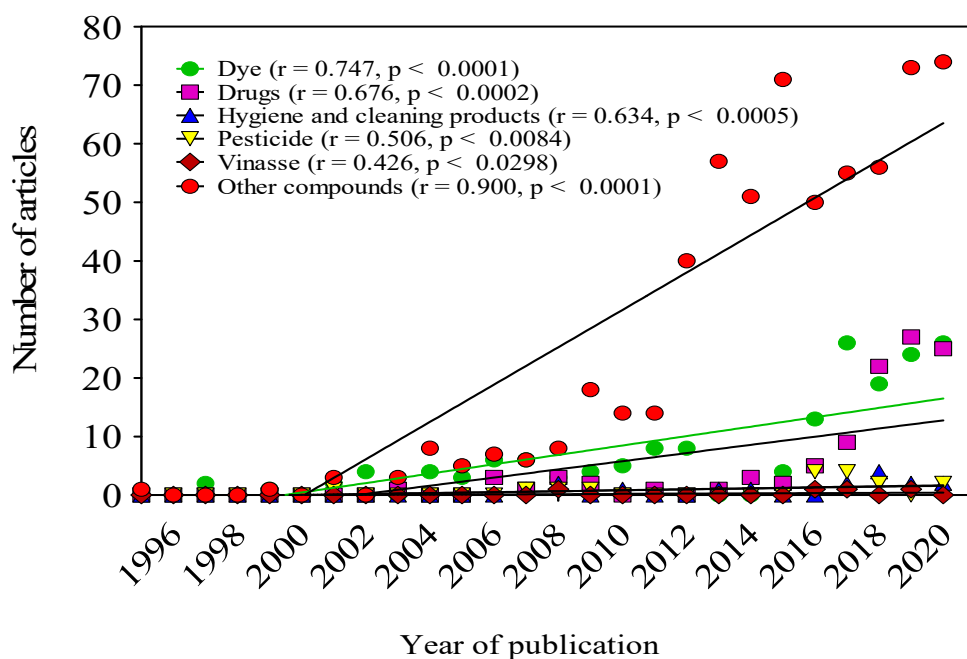

**Figure S2.** Time trend for the number of articles published between 1995 and 2020 in the Web of Science database, considering the origin of effluents degraded by Fenton.

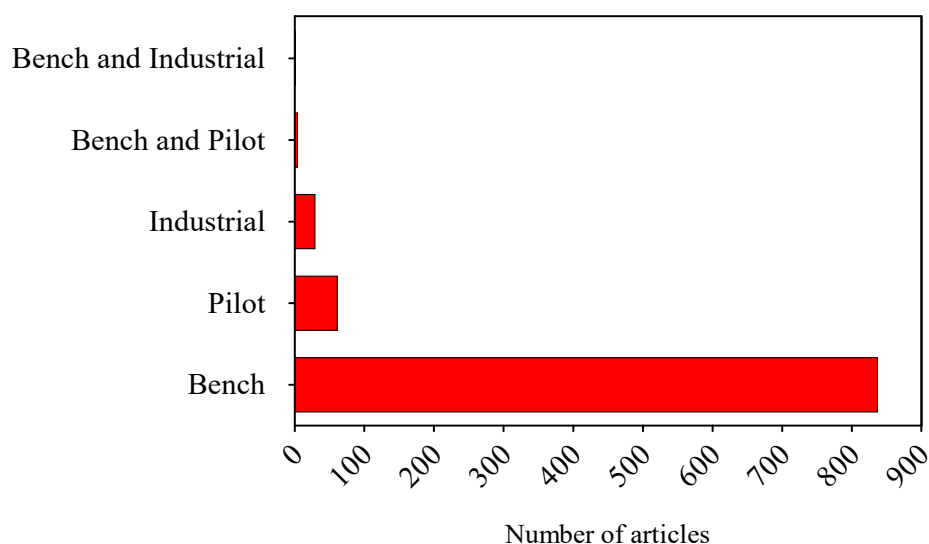

**Figure S3.** Types of scale in which the Fenton studies were carried out.

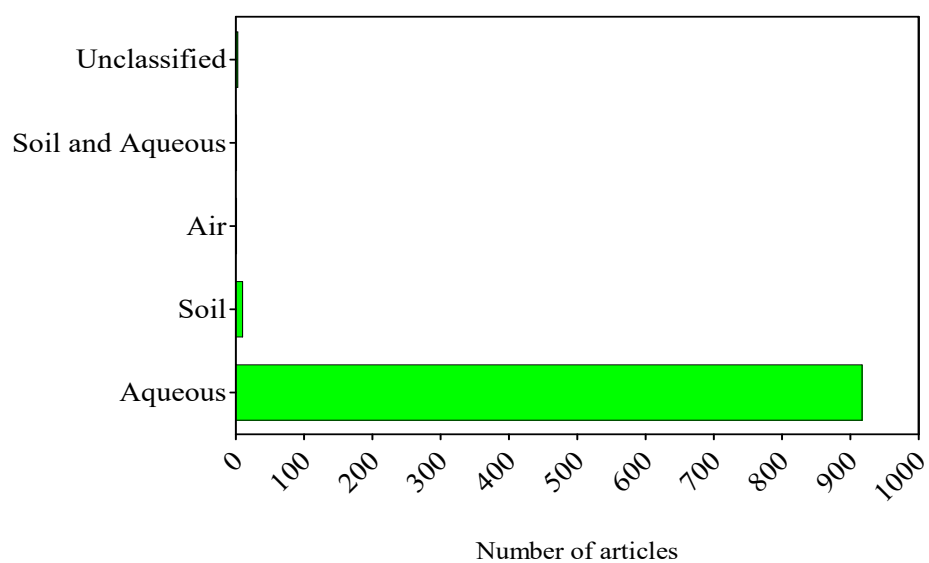

**Figure S4.** Types of matrices in which the Fenton studies were carried out.
